Dimo Model

 $R^2=0.90$  Coefficient=0.56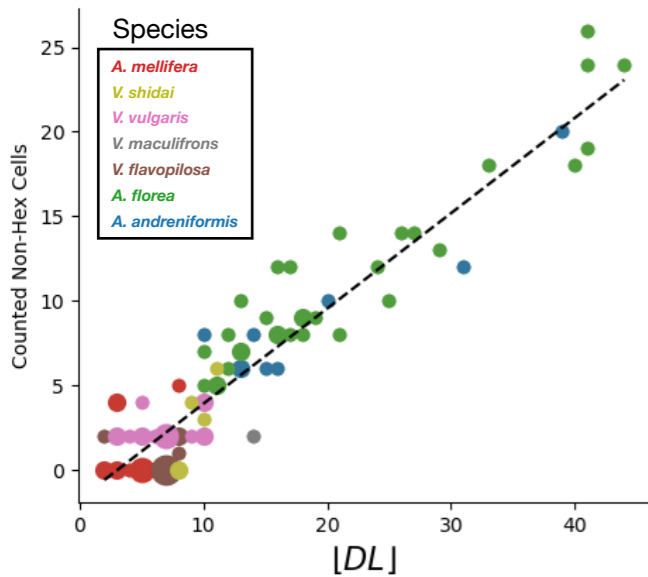

Alpha Model

 $R^2=0.89$  Coefficient=1.53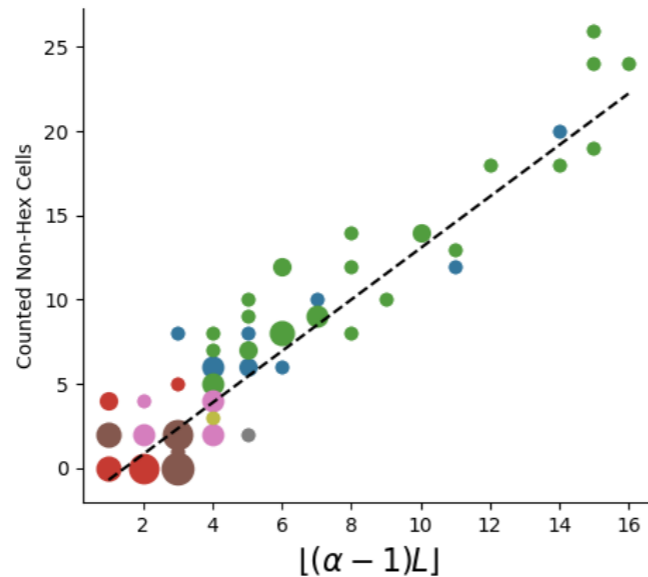

One Step Model

 $R^2=0.86$  Coefficient=1.32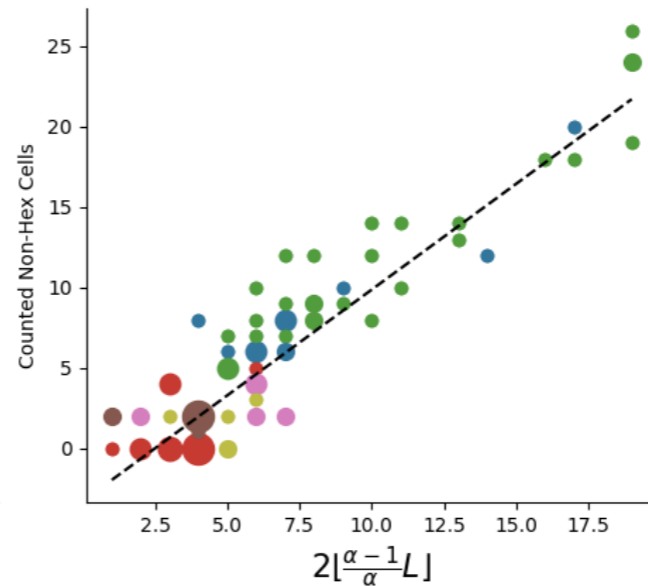

Transition Model

 $R^2=0.93$  Coefficient=1.07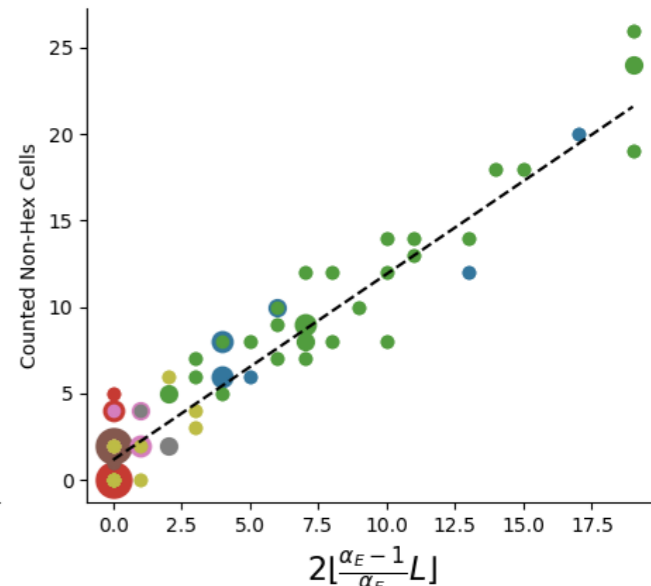

Source: https://storage.googleapis.com/plos-corpus-prod/10.1371/journal.pbio.3002211/1/pbio.3002211.s002.pdf
